# Supplementary material for: Surface Mechanical Characterization of Carbon Nanofiber Reinforced Low-Density Polyethylene by Nanoindentation and Comparison with Bulk Properties
Source: PubMed Central journal article supplement (PMC6835558; doi:10.3390/nano9101357), 2019-09-22
Supplement: nanomaterials-09-01357-s001.pdf [file nanomaterials-09-01357-s001.pdf]

Supplementary material:

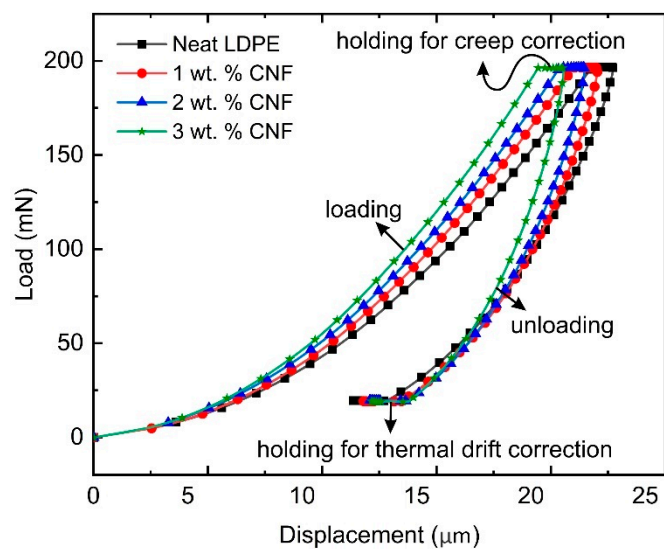

Figure S1. Representative load-displacement curve with no “nose” effect with holding time as 50 s.

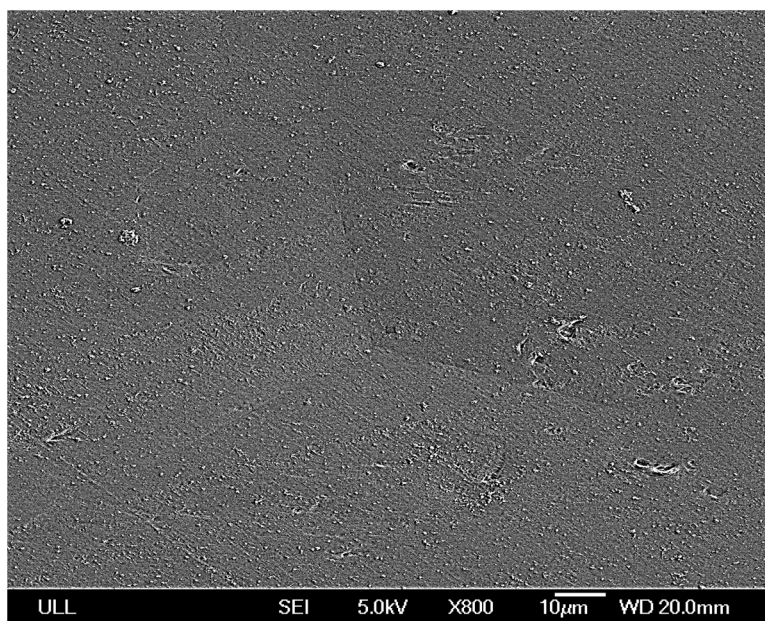

Figure S2. SEM image of a single indent in 2 wt. % CNF/LDPE showing no pile-up effect
